# Supplementary material for: Identification and quantification of particulate tracers of exhaust and non-exhaust vehicle emissions
Source: Copernicus journal article supplement (doi:10.5194/acp-2018-816), 2018-10-01
Supplement: Supplementary file 1 [file acp-2018-816-supplement.pdf]

# **Identification and quantification of particulate tracers of exhaust and non-exhaust vehicle emissions**

Aurélie Charron<sup>1,2</sup>, Lucie Polo-Rehn<sup>1,2</sup>, Jean-Luc Besombes<sup>3</sup>, Benjamin Golly<sup>3</sup>, Christine Buisson<sup>4</sup>, Hervé Chanut<sup>5</sup>, Nicolas Marchand<sup>6</sup>, Géraldine Guillaud<sup>5</sup>, and Jean-Luc Jaffrezo<sup>1</sup>

## **Supplementary Information**

## I. Characteristics of test vehicles

The selected vehicles represent the most frequent vehicle classes in the French fleet in circulation, according to the following criteria: European emission standards (EURO classes), motorization (diesel or petrol), engine capacity (large-, intermediate-, small-engined cars, defined as vehicles with the following capacities: below 1.4 L, from 1.4 to 2 L, above 2 L), and the presence or not of an after-treatment system. According to André et al. (2014), Euro 3 and Euro 4 vehicles accounted in 2011 for the largest part of the French fleet in circulation, followed by Euro 5 and Euro 2 vehicles. They also estimated that diesel vehicles with medium engine displacement (1.4 to 2.0 liters) accounted for 78 % of the diesel vehicles, while petrol vehicles with small displacement (less than 1.4 liters) were the most numerous (62 % of petrol vehicles). Chassis dynamometer experiments have been conducted before the field campaign, and the small differences between the French fleet and the local fleet are discussed in Fallah Shorshani et al. (2015). Finally, three diesel and one petrol vehicles have been chosen as a good representation of the French fleet in circulation in 2011, as follows:

- Petrol Euro 2 with small engine displacement (< 1.4 l) – below referred as E2P
- Petrol Euro 4 with small engine displacement (< 1.4 l) – below referred as E4P
- Diesel Euro 3 with medium engine displacement (1.4 – 2 l) – E3D
- Diesel Euro 4 with medium engine displacement (1.4 – 2 l) - E4D
- Diesel Euro 4 with medium engine displacement (1.4 – 2 l) and equipped with a particulate filter, instead a Euro 5 diesel vehicle) – referred as E4D-PF. Note that this vehicle met Euro 5 standard for PM emissions thanks to the presence of the particle filter, but not the Euro 5 standard for NOx emissions.

No high-emitting vehicles has been selected (all test vehicles followed their own EU regulations).

| vehicles      | Vehicle fuel | EURO class | Vehicle model     | Year | Mileage km | Engine dCi | Emission control device |
|---------------|--------------|------------|-------------------|------|------------|------------|-------------------------|
| <b>E4P</b>    | Petrol       | EURO 4     | Renault Clio 3    | 2006 | 82,000     | 1.4        | TWC                     |
| <b>E2P</b>    | Petrol       | EURO 2     | Ford Ka           | 1999 | 72,000     | 1.3        | CC                      |
| <b>E3D</b>    | Diesel       | EURO 3     | Xsara Picasso HDI | 2003 | 140,000    | 1.9        | DOC                     |
| <b>E4D</b>    | Diesel       | EURO 4     | Renault Kangoo    | 2005 | 146,000    | 1.5        | DOC                     |
| <b>E4D-PF</b> | Diesel       | EURO 4     | Audi TDI          | 2009 | 73,800     | 1.9        | DOC+PF                  |

Table I-1: Detailed characteristics of vehicles run on chassis dynamometer. TWC: three-way catalyst; DOC: diesel oxidation catalyst ; PF: particle filter ; CC: catalyst converter

## II. PM<sub>10</sub> mass and chemistry measured at the traffic site

|             | PM <sub>10</sub>         | PM <sub>2.5</sub>        | OC                       | EC                       | NO                       | NO <sub>2</sub>          | NO <sub>x</sub>          |
|-------------|--------------------------|--------------------------|--------------------------|--------------------------|--------------------------|--------------------------|--------------------------|
| <i>Unit</i> | $\mu\text{g}/\text{m}^3$ |
| median      | 24.1                     | 18.4                     | 5.4                      | 5.9                      | 43.6                     | 51.8                     | 103.8                    |
| min         | 4.9                      | 4.9                      | 1.6                      | 1.8                      | 6.4                      | 20.1                     | 27.1                     |
| max         | 45.1                     | 35.4                     | 8.6                      | 12.6                     | 212.4                    | 86.5                     | 298.9                    |

Table II-1 : 4-h Concentrations of PM<sub>x</sub> (TEOM-FDMS), organic and elemental carbons and nitrogen oxides

|             | Cl <sup>-</sup>        | NO <sub>3</sub> <sup>-</sup> | SO <sub>4</sub> <sup>2-</sup> | Oxalates               | Na <sup>+</sup>        | NH <sub>4</sub> <sup>+</sup> | K <sup>+</sup>         |
|-------------|------------------------|------------------------------|-------------------------------|------------------------|------------------------|------------------------------|------------------------|
| <i>Unit</i> | $\text{ng}/\text{m}^3$ | $\text{ng}/\text{m}^3$       | $\text{ng}/\text{m}^3$        | $\text{ng}/\text{m}^3$ | $\text{ng}/\text{m}^3$ | $\text{ng}/\text{m}^3$       | $\text{ng}/\text{m}^3$ |
| median      | 17.6                   | 476.5                        | 1227.9                        | 120.2                  | 75.5                   | 366.7                        | 70.8                   |
| min         | 6.2                    | 2.8                          | 166.6                         | 8.6                    | 6.3                    | 22.2                         | 14.0                   |
| max         | 188.2                  | 1571.6                       | 2198.6                        | 285.9                  | 273.2                  | 784.0                        | 120.4                  |

|             | Mg <sup>2+</sup>       | Ca <sup>2+</sup>       |
|-------------|------------------------|------------------------|
| <i>Unit</i> | $\text{ng}/\text{m}^3$ | $\text{ng}/\text{m}^3$ |
| median      | 15.5                   | 373.5                  |
| min         | 0.6                    | 7.3                    |
| max         | 2820.0                 | 981.4                  |

Table II-2 : 4-h Concentrations of major ions

|             | Al                     | As                     | Ba                     | Ca                     | Cd                     | Co                     | Cr                     |
|-------------|------------------------|------------------------|------------------------|------------------------|------------------------|------------------------|------------------------|
| <i>Unit</i> | $\text{ng}/\text{m}^3$ |
| median      | 361.1                  | 0.108                  | 12.0                   | 819.9                  | 0.011                  | 0.201                  | 5.8                    |
| min         | 31.6                   | <DL                    | <DL                    | 42.3                   | 0.011                  | 0.037                  | <DL                    |
| max         | 1118.4                 | 0.643                  | 65.8                   | 4347.9                 | 4.439                  | 0.814                  | 60.3                   |

|             | Cu                     | Fe                     | Mn                     | Na                     | Pb                     | Pd                     | Rb                     |
|-------------|------------------------|------------------------|------------------------|------------------------|------------------------|------------------------|------------------------|
| <i>Unit</i> | $\text{ng}/\text{m}^3$ |
| median      | 48.4                   | 1011.4                 | 11.7                   | 321.9                  | 3.7                    | 0.103                  | 0.309                  |
| min         | 3.3                    | 67.5                   | 0.4                    | 41.0                   | 0.5                    | 0.103                  | 0.001                  |
| max         | 146.9                  | 5164.7                 | 56.8                   | 881.4                  | 14.5                   | 3.916                  | 1.670                  |

|             | Sb                     | Se                     | Sn                     | Sr                     | Ti                     | V                      | Zn                     |
|-------------|------------------------|------------------------|------------------------|------------------------|------------------------|------------------------|------------------------|
| <i>Unit</i> | $\text{ng}/\text{m}^3$ |
| median      | 4.7                    | 0.19                   | 9.9                    | 0.95                   | 5.3                    | 0.514                  | 28.6                   |
| min         | 0.4                    | <DL                    | 0.7                    | 0.02                   | 1.4                    | 0.105                  | 18.3                   |
| max         | 10.1                   | 1.40                   | 36.0                   | 13.90                  | 53.9                   | 1.921                  | 881.4                  |

|             | Zr                     |
|-------------|------------------------|
| <i>Unit</i> | $\text{ng}/\text{m}^3$ |
| median      | 1.6                    |
| min         | 1.6                    |
| max         | 35.1                   |

Table II-3 : 4-h Concentrations of metals and trace elements

|             | <b>Phe</b>              | <b>An</b>               | <b>Fla</b>              | <b>Pyr</b>              | <b>BaA</b>              | <b>Chr</b>              | <b>BeP</b>              |
|-------------|-------------------------|-------------------------|-------------------------|-------------------------|-------------------------|-------------------------|-------------------------|
| <i>Unit</i> | <i>ng/m<sup>3</sup></i> |
| median      | 0.131                   | 0.0099                  | 0.235                   | 0.301                   | 0.087                   | 0.063                   | 0.037                   |
| min         | 0.001                   | 0.0026                  | 0.054                   | <DL                     | 0.016                   | <DL                     | <DL                     |
| max         | 0.307                   | 0.0772                  | 0.528                   | 0.921                   | 1.047                   | 0.470                   | 0.366                   |
|             | <b>BbF</b>              | <b>BkF</b>              | <b>BaP</b>              | <b>BghiP</b>            | <b>DBahA</b>            | <b>IP</b>               | <b>Cor</b>              |
| <i>Unit</i> | <i>ng/m<sup>3</sup></i> |
| median      | 0.058                   | 0.017                   | 0.029                   | 0.031                   | <DL                     | 0.019                   | 0.015                   |
| min         | 0.019                   | 0.005                   | 0.005                   | <DL                     | <DL                     | 0.005                   | <DL                     |
| max         | 0.403                   | 0.124                   | 0.292                   | 0.257                   | 0.060                   | 0.270                   | 0.174                   |

Table II-4 : 4-h Concentrations of Polycyclic Aromatic Hydrocarbons

|             | <b>C12</b>              | <b>C13</b>              | <b>C14</b>              | <b>C15</b>              | <b>C16</b>              | <b>C17</b>              | <b>C18</b>              |
|-------------|-------------------------|-------------------------|-------------------------|-------------------------|-------------------------|-------------------------|-------------------------|
| <i>Unit</i> | <i>ng/m<sup>3</sup></i> |
| median      | <DL                     | <DL                     | <DL                     | <DL                     | <DL                     | 0.172                   | 0.381                   |
| min         | <DL                     |
| max         | 0.332                   | 0.898                   | 0.847                   | 0.356                   | 0.479                   | 1.658                   | 1.857                   |
|             | <b>C19</b>              | <b>C20</b>              | <b>C21</b>              | <b>C22</b>              | <b>C23</b>              | <b>C24</b>              | <b>C25</b>              |
| <i>Unit</i> | <i>ng/m<sup>3</sup></i> |
| median      | 0.475                   | 1.207                   | 3.254                   | 5.939                   | 7.017                   | 5.864                   | 4.045                   |
| min         | <DL                     | <DL                     | <DL                     | <DL                     | 0.256                   | 0.140                   | 0.165                   |
| max         | 2.174                   | 3.724                   | 10.788                  | 18.691                  | 18.679                  | 16.246                  | 10.062                  |
|             | <b>C26</b>              | <b>C27</b>              | <b>C28</b>              | <b>C29</b>              | <b>C30</b>              | <b>C31</b>              | <b>C32</b>              |
| <i>Unit</i> | <i>ng/m<sup>3</sup></i> |
| median      | 2.409                   | 2.574                   | 0.839                   | 2.314                   | 0.834                   | 2.004                   | 0.393                   |
| min         | 0.086                   | 0.064                   | <DL                     | <DL                     | <DL                     | <DL                     | <DL                     |
| max         | 6.900                   | 6.288                   | 4.354                   | 5.253                   | 3.177                   | 5.909                   | 2.061                   |
|             | <b>C33</b>              | <b>C34</b>              | <b>C35</b>              | <b>C36</b>              | <b>C37</b>              | <b>C38</b>              | <b>C39</b>              |
| <i>Unit</i> | <i>ng/m<sup>3</sup></i> |
| median      | 0.818                   | <DL                     | <DL                     | <DL                     | <DL                     | <DL                     | <DL                     |
| min         | <DL                     |
| max         | 2.597                   | 1.398                   | 1.620                   | 0.337                   | 0.317                   | 0.337                   | 0.440                   |
|             | <b>C40</b>              | <b>Pristane</b>         | <b>Phytane</b>          | <b>H3</b>               | <b>H4</b>               | <b>Manno</b>            | <b>Levo</b>             |
| <i>Unit</i> | <i>ng/m<sup>3</sup></i> |
| median      | <DL                     | <DL                     | <DL                     | 0.366                   | 0.343                   | 0.94                    | 11.1                    |
| min         | <DL                     |
| max         | 0.389                   | 0.172                   | 0.140                   | 1.679                   | 1.488                   | 4.47                    | 47.5                    |

Table II-5 : 4-h Concentrations of n-alkanes from C12 to C40, 2 branched alkanes, 2 hopanes (H3: 17 $\alpha$ 21 $\beta$ Norhopane ; H4: 17 $\alpha$ 21 $\beta$ hopane) and 2 anhydrosugars (mannosan; levoglucosan)

### III. Traffic characteristics

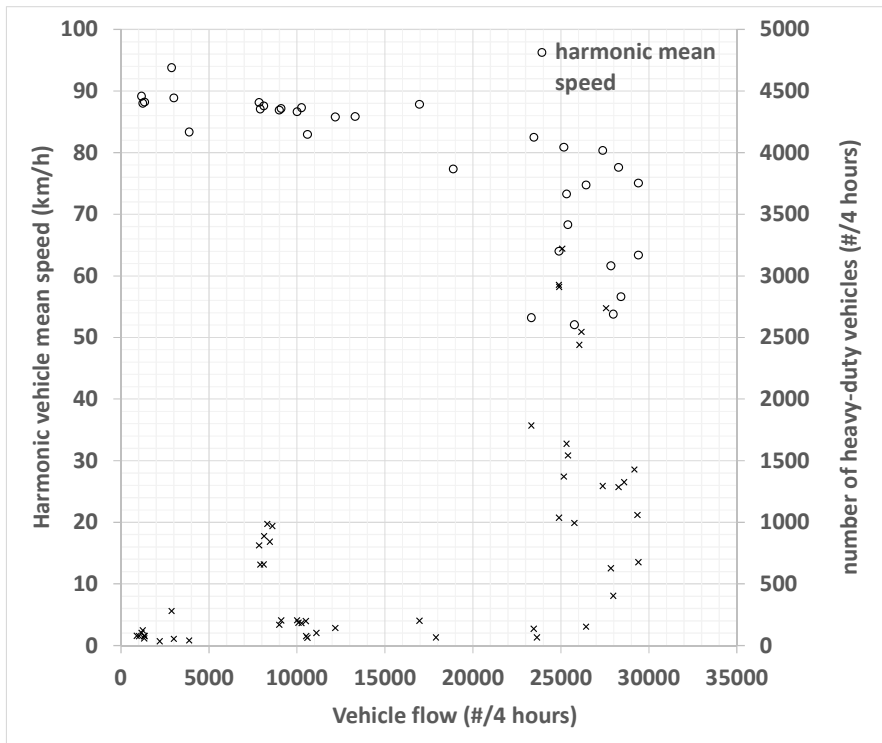

Table III-1: Harmonic vehicle mean speed (km/h) and number of heavy-duty vehicles versus the vehicle flow per period of 4 hours (corresponding to the sampling periods)

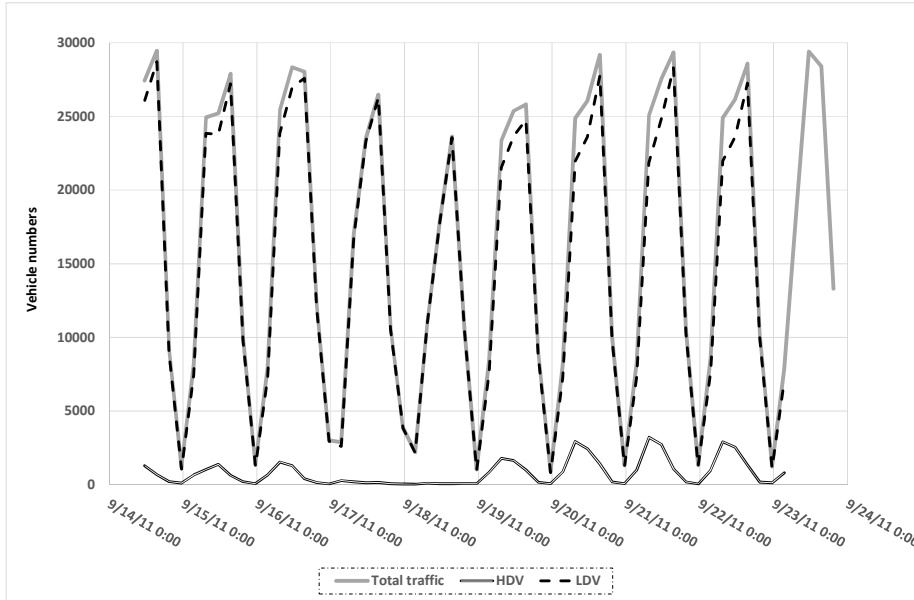

Table III-2 : Total, light-duty, and heavy-duty vehicle counts during the sampling period from double electromagnetic loops

## IV. Meteorology

A Young meteorological station was installed at the traffic site to capture wind speed and direction, relative humidity, and temperature data. Other meteorological data were supplied by Météo France or measured on the rooftop of our laboratory at the University Grenoble-Alpes (<http://www.lthe.fr/LTHE/MesuresEnLigne/MeteoOsugB.html>). Since rain events heavily influencing the PM levels occurred during the field campaign and no local measurements have been done, rain data from two stations located in Grenoble conurbation were compared: Grenoble-LVD Météo-France station (45.217 5.848, 13 km away from the traffic site) and CERMO station (45.194 5.762, 6 km away from the traffic site). An excellent agreement is found between the two stations.

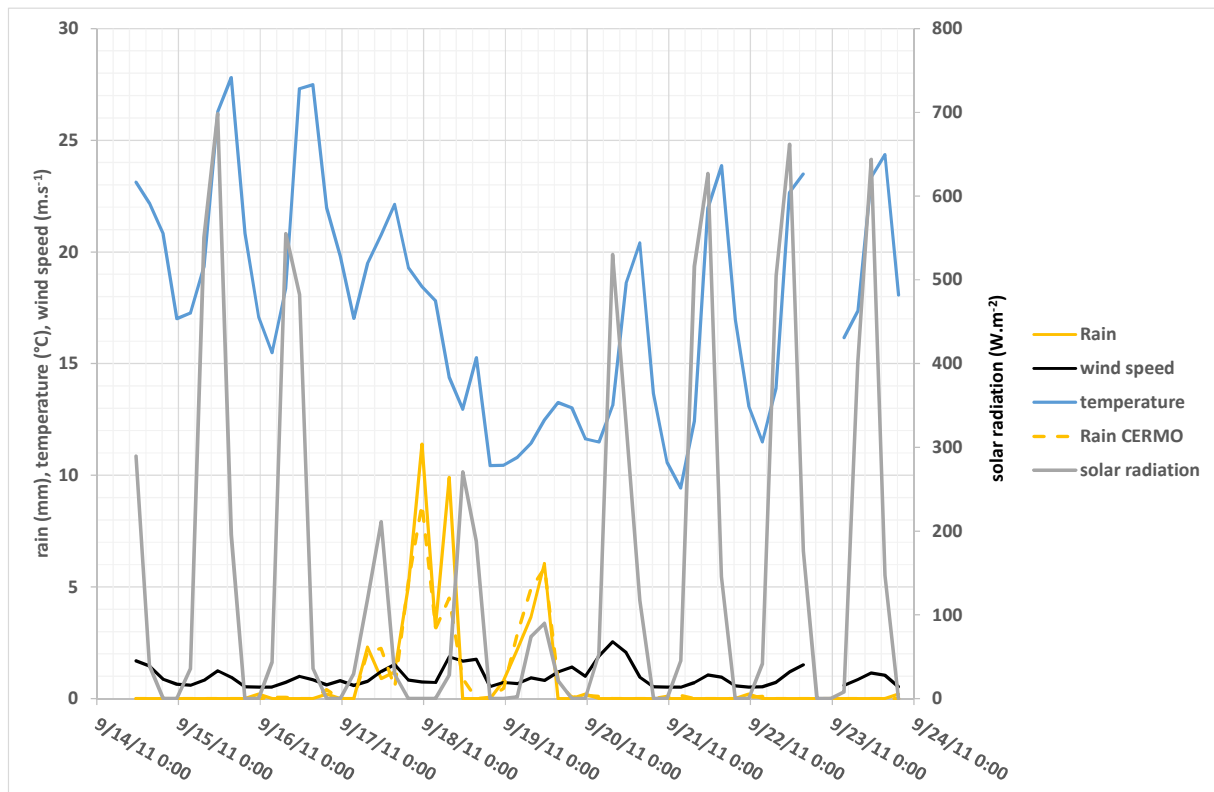

Table IV-1: Temperature, wind speed, solar radiation and rain (Météo France and CERMO data) measured during the field campaign. Temperature and wind speed are measured near the traffic site.

## V. Estimation of emission factors

We assume that particle and NO<sub>x</sub> concentrations measured on the traffic site result from the addition of local traffic emissions and the urban background of Grenoble (Les Frênes site).

Then, incremental concentrations of the pollutant  $p$  due to the local traffic are determined by difference (1).

$$\Delta C_p = C_p^{traffic\ site} - C_p^{urban\ background} \quad (1)$$

We assume that the atmospheric dilution affects similarly all pollutants emitted by the traffic (2). From this assumption, we could write:

$$\frac{EF_p}{\Delta C_p} = \frac{EF_{NO_x}}{\Delta C_{NO_x}} \quad (2)$$

With  $EF_p$ , the emission factor of pollutant  $p$ ,  $\Delta C_p$  the incremental concentrations of  $p$  assumed from the local traffic,  $EF_{NO_x}$  the emission factor of NO<sub>x</sub> et  $\Delta C_{NO_x}$ , the incremental concentrations of NO<sub>x</sub> from the local traffic.

We estimate NO<sub>x</sub> emissions ( $EF_{NO_x}$ ) from the local traffic from COPCETE data (SI, II. table 1), local traffic counts and the local vehicle fleet (determined by cameras, see Fallah Shorshani et al., 2015, II. table 2). No emission factor is available for two-wheelers, then the emission factor of petrol vehicles is used to estimate their emissions. COPCETE uses emission functions from European COPERT4 (Ntziachristos et al., 2009) averaged for fleet composition and speed. The average emission factors of NO<sub>x</sub> for heavy-duty and light duty vehicles at the RN87 highway are estimated to be respectively 5.218 g.veh<sup>-1</sup>.km<sup>-1</sup> and 0.523 g.veh<sup>-1</sup>.km<sup>-1</sup>.

Then, formula (2) allows the determination of hourly vehicle emissions from the RN87/E712 highway. The EF per vehicle can be calculated using  $N^{total}$  the total number of vehicles crossing the sampling area during the sampling period:

$$EF_p = \frac{EF_{NO_x}}{\Delta C_{NO_x}} \cdot \frac{\Delta C_p}{N^{total}} \quad (3)$$

Emission factors calculated as above are average emission factors for the E712 vehicle fleet. In theory the emissions of pollutant  $p$  from local traffic come from the addition of heavy-duty traffic emissions and light duty traffic emissions (4).

$$E_p^{RN87} = EF_p^{LDV} \cdot N^{LDV} + EF_p^{HDV} \cdot N^{HDV} \quad (4)$$

With  $N^{LDV}$  and  $N^{HDV}$  are respectively the heavy-duty and light duty traffic counts.

In order to discriminate the respective contributions of heavy-duty  $EF_p^{HDV}$  and light duty vehicles  $EF_p^{LDV}$  to particulate emissions, Multiple Linear Regressions (MLR) are applied to data that show significant relationships with the traffic and for which corresponding emission data follow (or are sufficiently close to) the Normal distribution. There is no collinearity between light-duty and heavy-duty traffic data (VIF equal to 1.9 for the dataset of metals and 1.4 for the dataset of the organics species), while petrol and diesel traffic data are strongly correlated.

|                   | <i>NO<sub>x</sub></i> | <i>PM</i>   |
|-------------------|-----------------------|-------------|
|                   | <b>g/km</b>           | <b>g/km</b> |
| <i>Diesel PC</i>  | 0.555572              | 0.072830    |
| <i>Petrol PC</i>  | 0.303579              | 0.045651    |
| <i>Hybrid PC</i>  | 0.022623              | 0.044401    |
| <i>LPG PC</i>     | 0.099782              | 0.045719    |
| <i>Diesel CUV</i> | 0.781215              | 0.089742    |
| <i>Petrol CUV</i> | 0.430468              | 0.051572    |
| <i>Lorries</i>    | 5.165895              | 0.65918     |
| <i>Buses</i>      | 6.85756               | 0.668866    |
| <b>TOTAL</b>      | 0.710245              | 0.091522    |

Table V-1: Emission factors of NO<sub>x</sub> and PM (COPCETE data). PC: passenger cars, CUV: commercial utility vehicles

|                   | <b>%</b> |
|-------------------|----------|
| <i>HDV</i>        | 3.78     |
| <i>Diesel CUV</i> | 15.73    |
| <i>2-wheelers</i> | 0.83     |
| <i>Diesel PC</i>  | 54.52    |
| <i>Other PC</i>   | 0.69     |
| <i>Petrol PC</i>  | 24.34    |
| <i>Buses</i>      | 0.12     |

Table V-2: Mean fleet used to compute NO<sub>x</sub> emissions

## VI. Calculation of Carbon Preference Index (CPI)

$$CPI = \frac{\sum C_i}{\sum C_j}$$

Where  $C_i$  and  $C_j$  represent concentrations of odd and even carbon numbers n-alkanes respectively



## VII. Temporal variations of concentrations

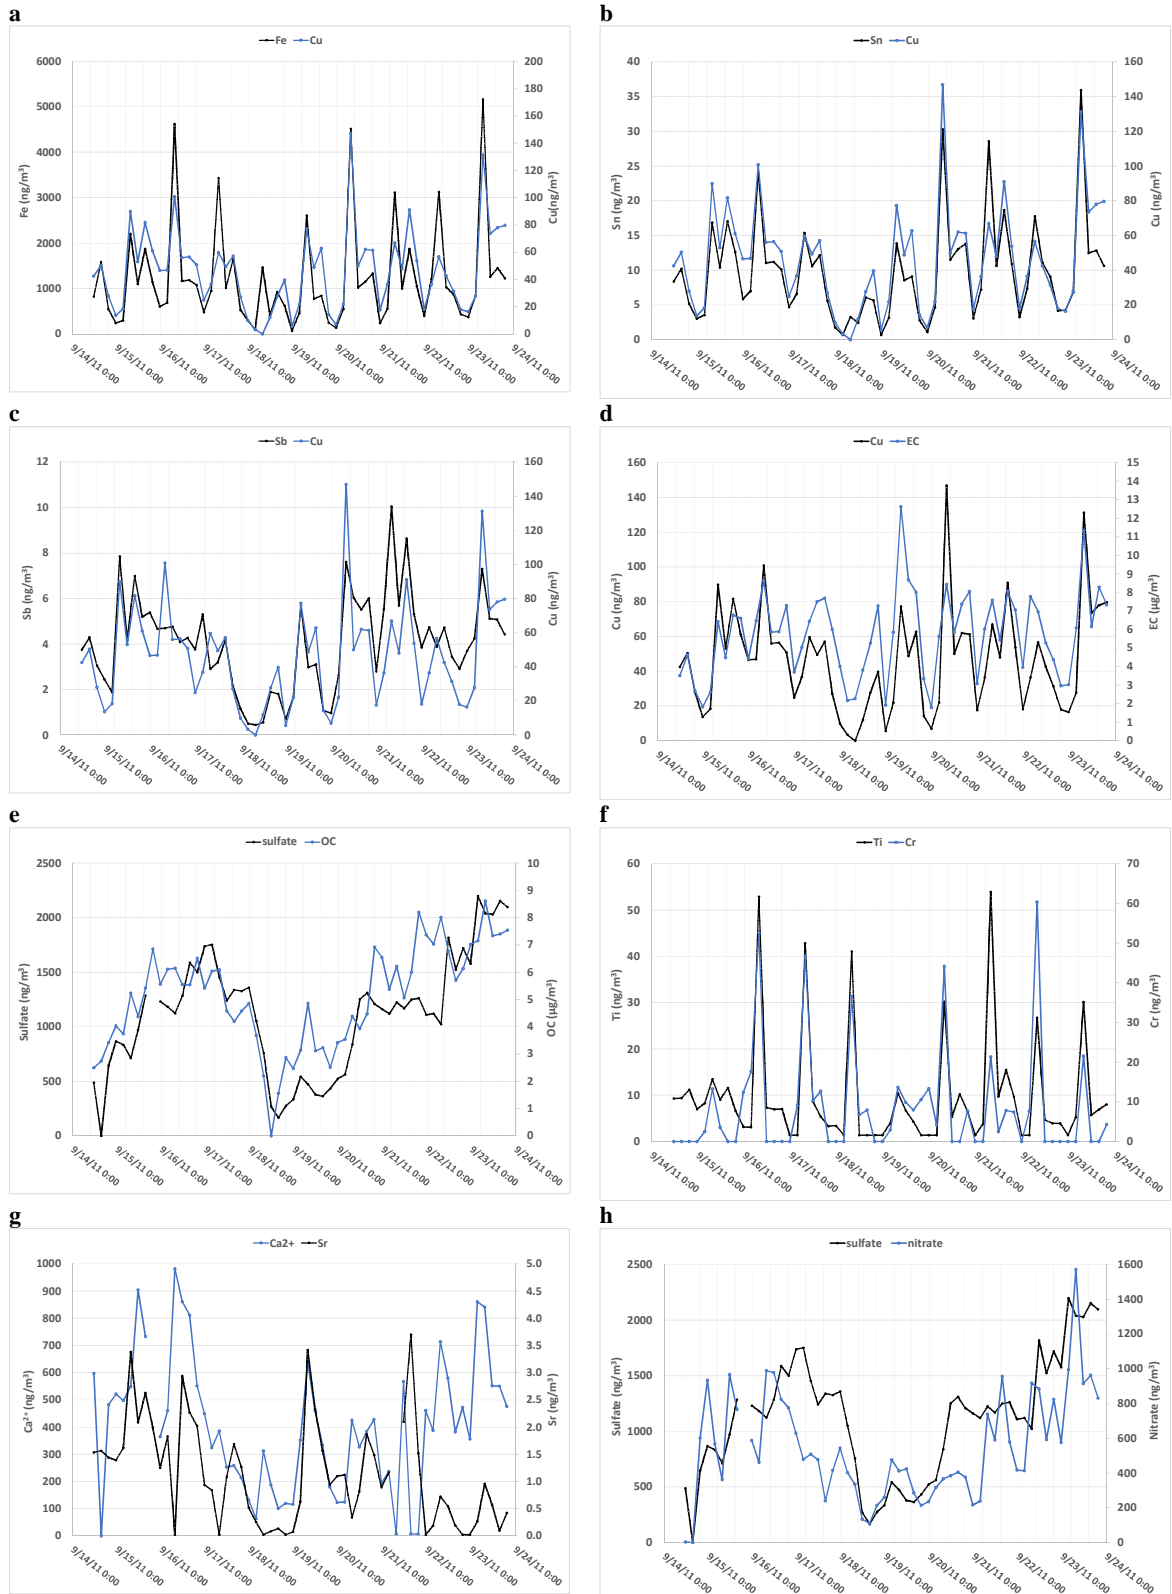

Figure VII-1: 4-hour concentrations measured at the traffic site: a: iron and copper; b: copper and tin; c: copper and antimony; d: copper and elemental carbon; e: sulfate and organic carbon; f: chromium and titanium; g: calcium and strontium; h: sulfate and nitrate

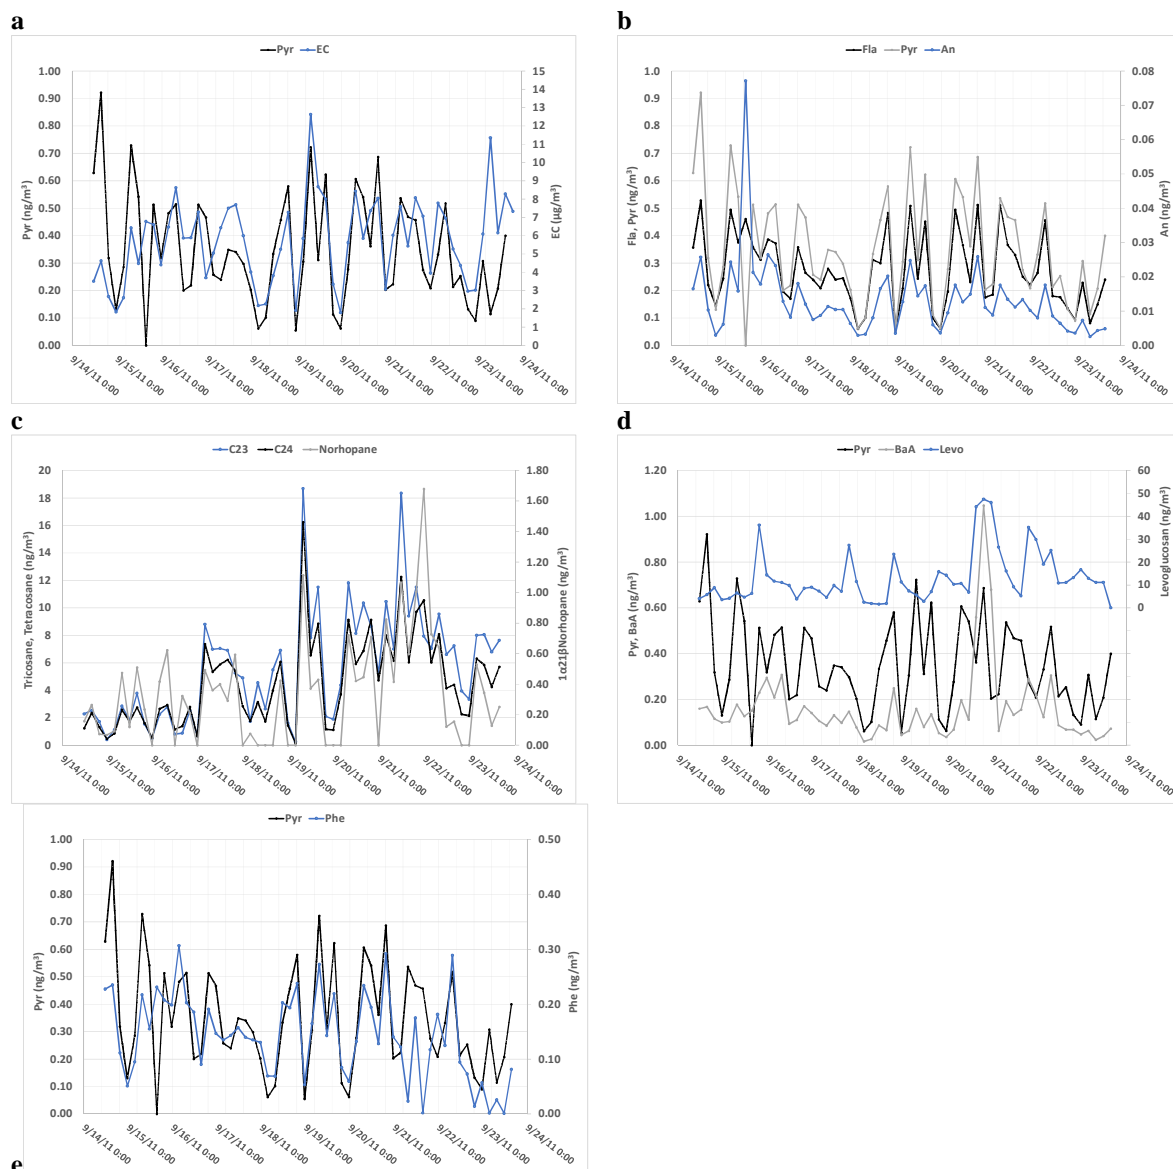

Figure VII-2: 4-hour concentrations measured at the traffic site: a: elemental carbon and pyrene; b: fluoranthene, pyrene and anthracene; c: tricosane, tetracosane and 17 $\alpha$ ,21 $\beta$ Norhopane; d: pyrene, benzo(a)anthracene and levoglucosan; e: pyrene and phenanthrene

## VIII. Correlations between concentrations

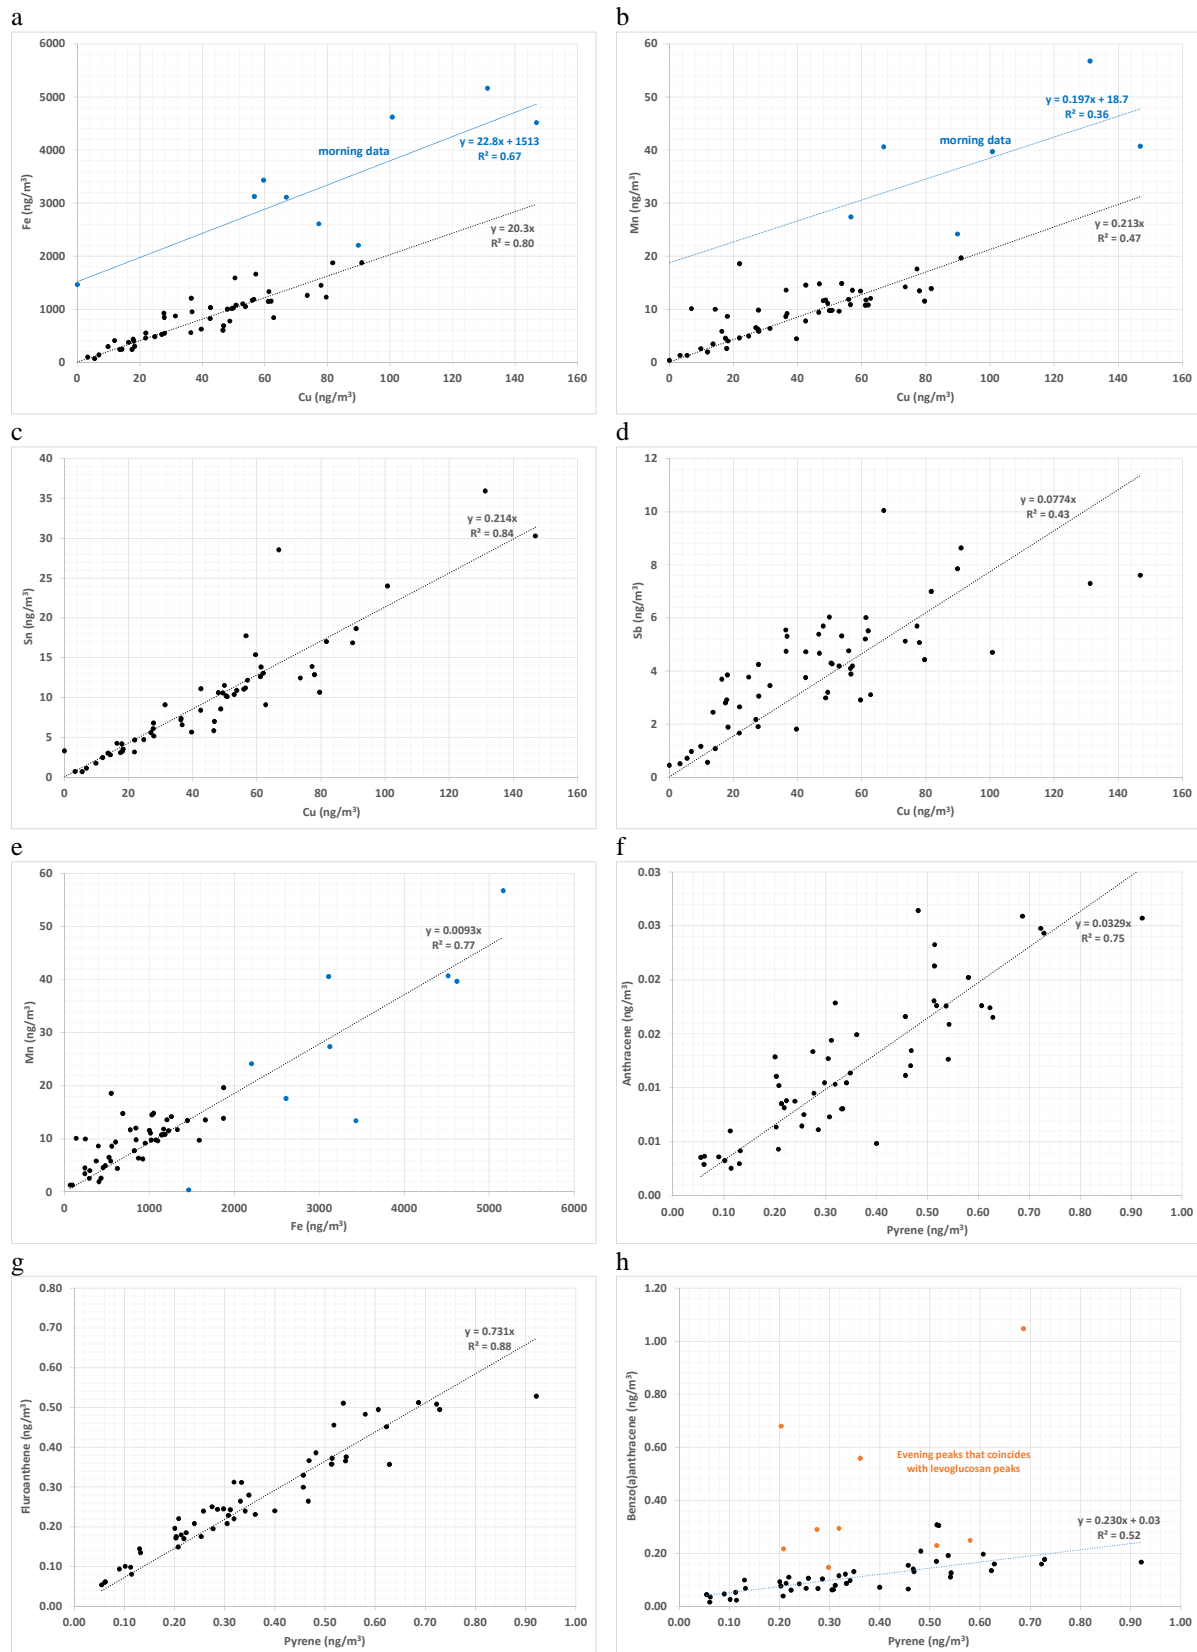

Figure VIII-1 : Scatterplots and linear relationships for a few species : a : iron vs.copper ; b : manganese vs.copper ; c : tin vs.copper ; d : antimony vs.copper ; e : manganese vs.iron ; f : anthracene vs. Pyrene ; g : fluoranthene vs. Pyrene ; h : benzo(a)anthracene vs. pyrene

## IX. Comparison with PM<sub>10</sub> emission factors of the recent literature (brake wear elements)

| PM <sub>10</sub> EFs                                | This study            | Johansson <i>et al.</i> 2009 | Bukowiecki <i>et al.</i> 2009 <sup>§</sup> | Bukowiecki <i>et al.</i> 2009 <sup>§§</sup> | Gillies <i>et al.</i> , 2001 | Handler <i>et al.</i> 2008 | Alves <i>et al.</i> 2015 | Hulskotte <i>et al.</i> 2004                         |                                                         |                                                           |
|-----------------------------------------------------|-----------------------|------------------------------|--------------------------------------------|---------------------------------------------|------------------------------|----------------------------|--------------------------|------------------------------------------------------|---------------------------------------------------------|-----------------------------------------------------------|
| <b>Location</b>                                     | Grenoble, France      | Stockholm, Sweden            | Zürich, Switzerland                        | Reiden Switzerland                          | L.A., U.S.                   | Vienna, Austria            | Braga, Portugal          | The Netherlands<br><br>Brake discs and pads analyses |                                                         |                                                           |
| <b>Road type</b>                                    | Urban freeway 4 lanes | Roadside                     | City centre Street canyon 2 lanes          | Inter urban freeway 4 lanes                 | Tunnel 2 bores with 3 lanes  | Highway tunnel             | Urban tunnel             |                                                      |                                                         |                                                           |
| <b>Traffic conditions</b>                           | Mainly congested      | Densely trafficked           | Queues at red lights                       | Mainly free-flowing                         |                              | Free flowing + congested   |                          |                                                      |                                                         |                                                           |
| <b>Speed limit/inf.</b>                             | 90 km.h <sup>-1</sup> |                              | 50 km.h <sup>-1</sup>                      | 120 km.h <sup>-1</sup>                      | 42.6/64.4 km.h <sup>-1</sup> | 80 km.h <sup>-1</sup>      |                          |                                                      |                                                         |                                                           |
| <b>Nb veh/day</b>                                   | 65-95,000             |                              | 22,000                                     | 50,000                                      | 3000 veh/hr                  | 36-50,000                  | 6,4-10,700               | Passenger cars<br>Average brake profile              |                                                         |                                                           |
| <b>%HDV</b>                                         | 0.3-12%               |                              | 10% <sup>§</sup>                           |                                             | 15% <sup>§</sup>             | 2.6%                       | 4-12.6%                  | 10%                                                  |                                                         |                                                           |
| <b>Results expected</b>                             | Brake + resuspension  | Brake + resuspension         | Brake + resuspension                       | Brake only                                  | Brake only                   | Brake + resuspension       | Brake + resuspension     | Brake + resuspension                                 | Low braking<br>8 mg.veh <sup>-1</sup> .km <sup>-1</sup> | High braking<br>15 mg.veh <sup>-1</sup> .km <sup>-1</sup> |
| <b>Ba</b><br>µg.veh <sup>-1</sup> .km <sup>-1</sup> | 66                    |                              | 145                                        | 39.1                                        | 11.9                         | 1040                       | 55                       | 670                                                  |                                                         |                                                           |
| <b>Cr</b><br>µg.veh <sup>-1</sup> .km <sup>-1</sup> | 43                    | 41                           |                                            |                                             |                              | 20                         |                          | 60                                                   | 30                                                      | 55                                                        |
| <b>Cu</b><br>µg.veh <sup>-1</sup> .km <sup>-1</sup> | 300                   | 542                          | 476.6                                      | 108.1                                       | 28.2                         | 530                        | 156                      | 110                                                  | 291                                                     | 546                                                       |
| <b>Fe</b><br>mg.veh <sup>-1</sup> .km <sup>-1</sup> | 6.71                  |                              | 6.83                                       | 1.85                                        | 0.56                         | 12.39                      | 3.4                      | 0.51                                                 | 5.75                                                    | 10.78                                                     |
| <b>Mn</b><br>µg.veh <sup>-1</sup> .km <sup>-1</sup> | 62                    | 110                          |                                            |                                             |                              | 70                         | 42                       | 60                                                   | 43                                                      | 80                                                        |
| <b>Sb</b><br>µg.veh <sup>-1</sup> .km <sup>-1</sup> | 27                    | 144                          | 74.1                                       | 17.9                                        | 32.3                         | 220                        | 100                      | 50                                                   | 64                                                      | 120                                                       |
| <b>Sn</b><br>µg.veh <sup>-1</sup> .km <sup>-1</sup> | 55                    | 126                          | 72.5                                       | 16.1                                        | 8.7                          | 70                         | 25                       |                                                      | 83                                                      | 155                                                       |
| <b>Ti</b><br>µg.veh <sup>-1</sup> .km <sup>-1</sup> | 28                    |                              |                                            |                                             |                              | 60                         | 47                       | 300                                                  | 32                                                      | 61                                                        |

§: traffic EFs related to an average 10% or 15% HDV and calculated from the three particle size fractions: 2.5-10; 1-2.5; and 0.1-1 µm for Zürich and the two size fractions 2.5-10 and 1-2.5 µm for Reiden; §: estimation for brake wear only
